# Supplementary material for: Application of Convolutional Neural Network for Fingerprint-Based Prediction of Gender, Finger Position, and Height
Source: MDPI journal article supplement (doi:10.3390/e24040475), 2022-03-29
Supplement: s1 [file s1]

### Supplementary File S3. The predictions of each finger position

**Table S1.** Finger position prediction testing results obtained from five validated models of VGG16 (average accuracy of 84.8%)

| True \ Predict | L1  | L2    | L3    | L4   | L5   | R1  | R2    | R3    | R4    | R5    | Accuracy (Mean±STD) |
|----------------|-----|-------|-------|------|------|-----|-------|-------|-------|-------|---------------------|
| L1             | 193 | 3.2   | 1     | 0.2  | 0    | 1.2 | 1.2   | 0     | 0.2   | 0     | 96.5±0.7%           |
| L2             | 1.2 | 164.6 | 16    | 1.4  | 3    | 0.2 | 3     | 1.4   | 2     | 7.2   | 82.3±3.0%           |
| L3             | 3.6 | 12.6  | 158.6 | 12.2 | 4.2  | 0   | 0.6   | 2.2   | 5.4   | 0.6   | 79.3±2.2%           |
| L4             | 0.2 | 1.6   | 11.4  | 150  | 20.8 | 0   | 5.8   | 5.2   | 4.4   | 0.6   | 75.0±3.0%           |
| L5             | 0   | 0.8   | 1.4   | 17.4 | 172  | 0   | 6.8   | 0.8   | 0.6   | 0.2   | 86.0±2.9%           |
| R1             | 1   | 0.4   | 0.6   | 0    | 0    | 191 | 3.4   | 3.6   | 0     | 0     | 95.5±2.4%           |
| R2             | 0.2 | 1.8   | 0     | 1.8  | 3.6  | 0.8 | 175.8 | 11.2  | 1.8   | 3     | 87.9±3.8%           |
| R3             | 0.4 | 0.4   | 0.8   | 5.6  | 1    | 4   | 13.8  | 163.6 | 7     | 3.4   | 81.8±3.8%           |
| R4             | 0.8 | 2.2   | 4.6   | 6.6  | 0    | 1   | 1.8   | 14.2  | 150.4 | 18.4  | 75.2±3.4%           |
| R5             | 0   | 5.2   | 0.4   | 0.2  | 1    | 0   | 1.2   | 1.8   | 13.4  | 176.8 | 88.4±2.3%           |

**Table S2.** Finger position prediction testing results obtained from five validated models of Inception-v3 (average accuracy of 77.9%)

| True \ Predict | L1    | L2    | L3    | L4    | L5   | R1    | R2    | R3    | R4   | R5    | Accuracy (Mean±STD) |
|----------------|-------|-------|-------|-------|------|-------|-------|-------|------|-------|---------------------|
| L1             | 188.4 | 2.4   | 4     | 0.6   | 0    | 2.8   | 1     | 0.2   | 0.4  | 0.2   | 94.2±2.0%           |
| L2             | 1.8   | 139.8 | 21.4  | 4.4   | 5.8  | 0.6   | 6.6   | 1.8   | 9.4  | 8.4   | 69.9±4.1%           |
| L3             | 5.6   | 17    | 135.8 | 19.8  | 4.8  | 0.4   | 1.4   | 2.4   | 11   | 1.8   | 67.9±5.0%           |
| L4             | 1     | 2.4   | 14.6  | 143.8 | 20.8 | 0     | 5.2   | 4.8   | 6.8  | 0.6   | 71.9±3.7%           |
| L5             | 0     | 1.4   | 5.2   | 23.4  | 161  | 0     | 6.4   | 1.6   | 0.2  | 0.8   | 80.5±3.4%           |
| R1             | 3.8   | 0.6   | 0     | 0     | 0    | 187.2 | 3     | 4.6   | 0.8  | 0     | 93.6±1.7%           |
| R2             | 0.4   | 2.6   | 1.8   | 5.6   | 8.2  | 1.8   | 153.4 | 19.6  | 3    | 3.6   | 76.7±5.4%           |
| R3             | 0.4   | 1.2   | 1.6   | 9     | 0.8  | 4.4   | 20.4  | 143.6 | 12.8 | 5.8   | 71.8±4.5%           |
| R4             | 0.8   | 4.4   | 4.8   | 6.6   | 0    | 2.2   | 2.2   | 13.2  | 145  | 20.8  | 72.5±5.0%           |
| R5             | 0     | 7     | 1     | 0.2   | 1.2  | 0     | 1.6   | 6     | 22.8 | 160.2 | 80.1±4.5%           |

**Table S3.** Finger position prediction testing results obtained from five validated models of Resnet50 (average accuracy of 83.9%)

| True \ Predict | L1    | L2    | L3    | L4    | L5    | R1    | R2    | R3    | R4   | R5    | Accuracy (Mean±STD) |
|----------------|-------|-------|-------|-------|-------|-------|-------|-------|------|-------|---------------------|
| L1             | 191.2 | 3.6   | 2     | 0.2   | 0     | 2     | 0.8   | 0     | 0.2  | 0     | 95.6±1.3%           |
| L2             | 1.4   | 161.8 | 16.4  | 3.2   | 3.6   | 0.2   | 2.2   | 0.6   | 5.2  | 5.4   | 80.9±4.4%           |
| L3             | 3.4   | 12.4  | 158.2 | 10.6  | 3.4   | 0     | 1.2   | 1     | 9.2  | 0.6   | 79.1±2.8%           |
| L4             | 0.6   | 2.6   | 18.4  | 141.6 | 20.8  | 0     | 3.4   | 5     | 7    | 0.6   | 70.8±4.3%           |
| L5             | 0     | 1.4   | 4.2   | 21.6  | 165.4 | 0     | 4.2   | 1.2   | 0.6  | 1.4   | 82.7±3.3%           |
| R1             | 1.2   | 0.2   | 0.4   | 0     | 0     | 192.6 | 2.2   | 3     | 0.4  | 0     | 96.3±3.0%           |
| R2             | 0.6   | 2.8   | 1     | 2.6   | 5.2   | 1.6   | 165.8 | 15    | 3.6  | 1.8   | 82.9±3.6%           |
| R3             | 0     | 0.4   | 1.8   | 8.8   | 1     | 4.6   | 13.8  | 154.8 | 11.4 | 3.4   | 77.4±5.6%           |
| R4             | 0.6   | 3.2   | 6     | 4.6   | 0.2   | 1.2   | 2.4   | 8.2   | 159  | 14.6  | 79.5±2.9%           |
| R5             | 0     | 6.4   | 1.6   | 0.2   | 0.8   | 0     | 1.6   | 4     | 17   | 168.4 | 84.2±2.2%           |
