# Supplementary material for: Application of Convolutional Neural Network for Fingerprint-Based Prediction of Gender, Finger Position, and Height
Source: MDPI journal article supplement (doi:10.3390/e24040475), 2022-03-29
Supplement: s1 [file s1]

## Supplementary File S1. The structure of deep learning model

**Table S1.** Structure of VGG16

| Layers     | Filter size/stride | Input Size  |
|------------|--------------------|-------------|
| InputLayer | 480,360,3          |             |
| Conv.      | [3x3,64]/1         | 480,360,3   |
| Conv.      | [3x3,64]/1         | 480,360,64  |
| Maxooling  | [2x2]/2            | 480,360,64  |
| Conv.      | [3x3,128]/1        | 240,180,64  |
| Conv.      | [3x3,128]/1        | 240,180,128 |
| Maxooling  | [2x2]/2            | 240,180,128 |
| Conv.      | [3x3,256]/1        | 120,90,128  |
| Conv.      | [3x3,256]/1        | 120,90,256  |
| Conv.      | [3x3,256]/1        | 120,90,256  |
| Maxooling  | [2x2]/2            | 120,90,256  |
| Conv.      | [3x3,512]/1        | 60,45,256   |
| Conv.      | [3x3,512]/1        | 60,45,512   |
| Maxooling  | [2x2]/2            | 60,45,512   |
| Conv.      | 3*3(512)/1         | 30,22,512   |
| Conv.      | 3*3(512)/1         | 30,22,512   |
| Maxooling  | [2x2]/2            | 30,22,512   |
| FC         | Flatten=84,480     |             |
| Dense      | 256, relu          |             |
| Dropout    | 0.5                |             |
| Softmax    |                    |             |

**Table S3.** Structure of Resnet50

| Layers       | Filter size/stride | Input Size |
|--------------|--------------------|------------|
| InputLayer   | 480,360,3          |            |
| Conv.        | [3x3,32]/2         | 480,360,3  |
| Conv.        | [3x3,32]/1         | 239,179,32 |
| Conv. padded | [3x3,64]/1         | 237,177,32 |
| Pool         | [3x3,64]/2         | 237,177,64 |
| Conv.        | [1x1,80]/1         | 118,88,64  |
| Conv.        | [3x3,192]/1        | 118,88,80  |
| Pool         | [3x3,192]/2        | 116,86,192 |
| 3*Inception  | As Fig.3(a)        | 57,42,192  |
| 1*Inception  | As Fig.3(a-1)      | 28,20,768  |
| 4*Inception  | As Fig.3(b)        | 28,20,768  |
| 1*Inception  | As Fig.3(b-1)      | 28,20,768  |
| 2*Inception  | As Fig.3(c)        | 13,9,1280  |
| FC           | Flatten=239,616    |            |
| Dense        | 256, relu          |            |
| Dropout      | 0.5                |            |
| Softmax      |                    |            |

**Table S2.** Structure of Inception-v3

| Layers     | Filter size/stride                      | Output     |
|------------|-----------------------------------------|------------|
| InputLayer | 480,360,3                               |            |
| Conv.      | [7x7,64]/2                              | 480,360,3  |
| Maxpooling | [3x3]/2                                 | 240,180,64 |
| Conv.      | [1x1,64]<br>[3x3,64] x3<br>[1x1,256]    | 120,90,64  |
| Conv.      | [1x1,128]<br>[3x3,128] x4<br>[1x1,512]  | 120,90,256 |
| Conv.      | [1x1,256]<br>[3x3,256] x6<br>[1x1,1024] | 64,45,512  |
| Conv.      | [1x1,512]<br>[3x3,512] x3<br>[1x1,2048] | 30,23,1024 |
| FC         | Flatten=368,640                         |            |
| Dense      | 256, relu                               |            |
| Dropout    | 0.5                                     |            |
| Softmax    |                                         |            |

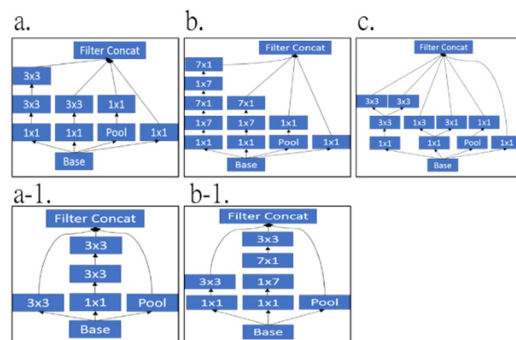

**Figure S1.** Inception unit
