# Supplementary material for: Application of Convolutional Neural Network for Fingerprint-Based Prediction of Gender, Finger Position, and Height
Source: MDPI journal article supplement (doi:10.3390/e24040475), 2022-03-29
Supplement: s1 [file s1]

Supplementary File S4. The predictions of height from specific finger position

**Table S1.** Male height prediction testing results obtained from five validated models of VGG16

| Male  | Finger Position | Tall    |           | Short   |           | Accuracy (Mean±STD) | Accuracy |
|-------|-----------------|---------|-----------|---------|-----------|---------------------|----------|
|       |                 | Correct | Incorrect | Correct | Incorrect |                     |          |
| VGG16 | All             | 131.8   | 68.2      | 123.8   | 76.2      | 63.9±4.1%           | 63.9%    |
|       | Exclude Thumb   | 93      | 67        | 113.4   | 46.6      | 64.5±2.6%           | 64.5%    |
|       | L1+R1           | 23.4    | 16.6      | 30      | 10        | 66.8±4.4%           | 66.8%    |
|       | L2+R2           | 27.6    | 12.4      | 24.4    | 15.6      | 65.0±3.6%           | 65.0%    |
|       | L3+R3           | 24.2    | 15.8      | 29      | 11        | 66.5±6.6%           | 66.5%    |
|       | L4+R4           | 28.8    | 11.2      | 27      | 13        | 69.8±4.4%           | 69.8%    |
|       | L5+R5           | 28.2    | 11.8      | 26      | 14        | 67.8±4.5%           | 67.8%    |

**Table S2.** Male height prediction testing results obtained from five validated models of Inception-v3

| Male         | Finger Position | Tall    |           | Short   |           | Accuracy (Mean±STD) | Accuracy |
|--------------|-----------------|---------|-----------|---------|-----------|---------------------|----------|
|              |                 | Correct | Incorrect | Correct | Incorrect |                     |          |
| Inception V3 | All             | 124.2   | 75.8      | 131     | 69        | 63.8±3.1%           | 63.8%    |
|              | Exclude Thumb   | 96.4    | 63.6      | 109.8   | 50.2      | 64.4±1.8%           | 64.4%    |
|              | L1+R1           | 20.2    | 19.8      | 26.6    | 13.4      | 58.5±6.8%           | 58.5%    |
|              | L2+R2           | 23.6    | 16.4      | 25      | 15        | 60.8±2.6%           | 60.8%    |
|              | L3+R3           | 28.2    | 11.8      | 21.8    | 18.2      | 62.5±4.4%           | 62.5%    |
|              | L4+R4           | 25.4    | 14.6      | 25.4    | 14.6      | 63.5±3.8%           | 63.5%    |
|              | L5+R5           | 23.6    | 16.4      | 25.4    | 14.6      | 61.3±2.7%           | 61.3%    |

**Table S3.** Male height prediction testing results obtained from five validated models of Resnet50

| Male     | Finger Position | Tall    |           | Short   |           | Accuracy (Mean±STD) | Accuracy |
|----------|-----------------|---------|-----------|---------|-----------|---------------------|----------|
|          |                 | Correct | Incorrect | Correct | Incorrect |                     |          |
| Resnet50 | All             | 113     | 87        | 141.8   | 58.2      | 63.7±2.2%           | 63.7%    |
|          | Exclude Thumb   | 84.4    | 75.6      | 123.8   | 36.2      | 65.1±2.7%           | 65.1%    |
|          | L1+R1           | 25      | 15        | 24      | 16        | 61.3±2.8%           | 61.3%    |
|          | L2+R2           | 23.6    | 16.4      | 24.2    | 15.8      | 59.8±8.0%           | 59.8%    |
|          | L3+R3           | 19.4    | 20.6      | 30      | 10        | 61.8±5.8%           | 61.8%    |
|          | L4+R4           | 27.8    | 12.2      | 26      | 14        | 67.3±4.9%           | 67.3%    |
|          | L5+R5           | 28.4    | 11.6      | 22.4    | 17.6      | 63.5±2.4%           | 63.5%    |

**Table S4.** Female height prediction testing results obtained from five validated models of VGG16

| Female | Finger Position | Tall    |           | Short   |           | Accuracy (Mean±STD) | Accuracy |
|--------|-----------------|---------|-----------|---------|-----------|---------------------|----------|
|        |                 | Correct | Incorrect | Correct | Incorrect |                     |          |
| VGG16  | All             | 123.4   | 76.6      | 126.4   | 73.6      | 62.5±1.9%           | 62.5%    |
|        | Exclude Thumb   | 91.4    | 68.6      | 111.4   | 48.6      | 63.4±2.9%           | 63.4%    |
|        | L1+R1           | 23.6    | 16.4      | 26.6    | 13.4      | 62.8±7.3%           | 62.8%    |
|        | L2+R2           | 26.8    | 13.2      | 20.2    | 19.8      | 58.8±5.4%           | 58.8%    |
|        | L3+R3           | 16.4    | 23.6      | 32.4    | 7.6       | 61.0±6.8%           | 61.0%    |
|        | L4+R4           | 27.2    | 12.8      | 23      | 17        | 62.8±5.8%           | 62.8%    |
|        | L5+R5           | 23.8    | 16.2      | 29.8    | 10.2      | 67.0±4.2%           | 67.0%    |

**Table S5.** Female height prediction testing results obtained from five validated models of Inception-v3

| Female       | Finger Position | Tall    |           | Short   |           | Accuracy (Mean±STD) | Accuracy |
|--------------|-----------------|---------|-----------|---------|-----------|---------------------|----------|
|              |                 | Correct | Incorrect | Correct | Incorrect |                     |          |
| Inception V3 | All             | 146.8   | 53.2      | 95.2    | 104.8     | 60.5±2.3%           | 60.5%    |
|              | Exclude Thumb   | 101.6   | 58.4      | 96.2    | 63.8      | 61.8±2.2%           | 61.8%    |
|              | L1+R1           | 19.2    | 20.8      | 25.2    | 14.8      | 55.5±5.6%           | 55.5%    |
|              | L2+R2           | 18.8    | 21.2      | 28      | 12        | 58.5±4.5%           | 58.5%    |
|              | L3+R3           | 27      | 13        | 20.4    | 19.6      | 59.3±4.6%           | 59.3%    |
|              | L4+R4           | 27.8    | 12.2      | 18.6    | 21.4      | 58.0±5.0%           | 58.0%    |
|              | L5+R5           | 28.6    | 11.4      | 26.4    | 13.6      | 68.8±8.1%           | 68.8%    |

**Table S6.** Female height prediction testing results obtained from five validated models of Resnet50

| Female   | Finger Position | Tall    |           | Short   |           | Accuracy (Mean±STD) | Accuracy |
|----------|-----------------|---------|-----------|---------|-----------|---------------------|----------|
|          |                 | Correct | Incorrect | Correct | Incorrect |                     |          |
| Resnet50 | All             | 98.4    | 101.6     | 152.8   | 47.2      | 62.8±3.6%           | 62.8%    |
|          | Exclude Thumb   | 85.2    | 74.8      | 123.8   | 36.2      | 65.3±3.7%           | 65.3%    |
|          | L1+R1           | 15.8    | 24.2      | 29.6    | 10.4      | 56.8±7.1%           | 56.8%    |
|          | L2+R2           | 21      | 19        | 26.2    | 13.8      | 59.0±6.5%           | 59.0%    |
|          | L3+R3           | 25      | 15        | 25.4    | 14.6      | 63.0±8.5%           | 63.0%    |
|          | L4+R4           | 21.8    | 18.2      | 27      | 13        | 61.0±7.6%           | 61.0%    |
|          | L5+R5           | 24.8    | 15.2      | 24.4    | 15.6      | 61.5±6.8%           | 61.5%    |
